# Supplementary material for: Dose-Response Relationship between Cumulative Occupational Lead Exposure and the Associated Health Damages: A 20-Year Cohort Study of a Smelter in China
Source: PubMed Central journal article supplement (PMC4808991; doi:10.3390/ijerph13030328), 2016-03-16

# Supplementary Materials: Dose-Response Relationship between Occupational Cumulative lead Exposure and the Associated Health Damages: A 20-Year Cohort Study of a Smelter in China

Yue Wu, Jun-Ming Gu, Yun Huang, Yan-Ying Duan, Rui-Xue Huang and Jian-An Hu

**Table S1.** Airborne lead concentrations in different occupational categories (mean  $\pm$  SD, mg/m<sup>3</sup>).

| Year | Sintering       | Crushing        | Drying          | Acid-Making     | Material Preparation | Slag Fuming     | Refining        | Electrolysis    | Reverberator Furnace | Gold and Silver Refining | Airing *        | Melting *       |
|------|-----------------|-----------------|-----------------|-----------------|----------------------|-----------------|-----------------|-----------------|----------------------|--------------------------|-----------------|-----------------|
| 1988 | 0.28 $\pm$ 0.03 | 0.40 $\pm$ 0.04 | 0.22 $\pm$ 0.02 | 0.04 $\pm$ 0.01 | 0.21 $\pm$ 0.03      | 0.16 $\pm$ 0.01 | 0.12 $\pm$ 0.02 | 0.10 $\pm$ 0.01 | 0.06 $\pm$ 0.01      | 0.09 $\pm$ 0.01          | 0.11 $\pm$ 0.02 | 0.10 $\pm$ 0.01 |
| 1989 | 0.26 $\pm$ 0.04 | 0.34 $\pm$ 0.03 | 0.24 $\pm$ 0.03 | 0.06 $\pm$ 0.01 | 0.22 $\pm$ 0.04      | 0.14 $\pm$ 0.02 | 0.12 $\pm$ 0.01 | 0.06 $\pm$ 0.01 | 0.06 $\pm$ 0.01      | 0.09 $\pm$ 0.01          | 0.12 $\pm$ 0.02 | 0.09 $\pm$ 0.01 |
| 1990 | 0.26 $\pm$ 0.03 | 0.46 $\pm$ 0.05 | 0.23 $\pm$ 0.04 | 0.06 $\pm$ 0.01 | 0.21 $\pm$ 0.04      | 0.09 $\pm$ 0.01 | 0.10 $\pm$ 0.02 | 0.08 $\pm$ 0.01 | 0.04 $\pm$ 0.01      | 0.08 $\pm$ 0.01          | 0.10 $\pm$ 0.02 | 0.11 $\pm$ 0.01 |
| 1991 | 0.27 $\pm$ 0.02 | 0.47 $\pm$ 0.04 | 0.24 $\pm$ 0.04 | 0.06 $\pm$ 0.01 | 0.21 $\pm$ 0.02      | 0.13 $\pm$ 0.02 | 0.08 $\pm$ 0.01 | 0.10 $\pm$ 0.02 | 0.06 $\pm$ 0.01      | 0.10 $\pm$ 0.01          | 0.11 $\pm$ 0.02 | 0.08 $\pm$ 0.01 |
| 1992 | 0.38 $\pm$ 0.04 | 0.49 $\pm$ 0.03 | 0.23 $\pm$ 0.03 | 0.06 $\pm$ 0.01 | 0.20 $\pm$ 0.01      | 0.10 $\pm$ 0.02 | 0.06 $\pm$ 0.01 | 0.08 $\pm$ 0.01 | 0.07 $\pm$ 0.01      | 0.10 $\pm$ 0.01          | 0.10 $\pm$ 0.02 | 0.09 $\pm$ 0.01 |
| 1993 | 0.27 $\pm$ 0.04 | 0.56 $\pm$ 0.05 | 0.22 $\pm$ 0.03 | 0.05 $\pm$ 0.01 | 0.17 $\pm$ 0.03      | 0.10 $\pm$ 0.02 | 0.10 $\pm$ 0.01 | 0.10 $\pm$ 0.02 | 0.08 $\pm$ 0.01      | 0.09 $\pm$ 0.02          | 0.13 $\pm$ 0.02 | 0.09 $\pm$ 0.01 |
| 1994 | 0.40 $\pm$ 0.04 | 0.35 $\pm$ 0.04 | 0.21 $\pm$ 0.04 | 0.05 $\pm$ 0.01 | 0.15 $\pm$ 0.01      | 0.11 $\pm$ 0.01 | 0.07 $\pm$ 0.01 | 0.09 $\pm$ 0.01 | 0.08 $\pm$ 0.02      | 0.05 $\pm$ 0.01          | 0.10 $\pm$ 0.02 | 0.10 $\pm$ 0.01 |
| 1995 | 0.36 $\pm$ 0.05 | 0.63 $\pm$ 0.04 | 0.22 $\pm$ 0.02 | 0.07 $\pm$ 0.01 | 0.15 $\pm$ 0.03      | 0.10 $\pm$ 0.01 | 0.07 $\pm$ 0.01 | 0.09 $\pm$ 0.01 | 0.09 $\pm$ 0.01      | 0.07 $\pm$ 0.01          | 0.09 $\pm$ 0.02 | 0.08 $\pm$ 0.01 |
| 1996 | 0.23 $\pm$ 0.04 | 0.66 $\pm$ 0.05 | 0.17 $\pm$ 0.02 | 0.04 $\pm$ 0.01 | 0.08 $\pm$ 0.01      | 0.03 $\pm$ 0.01 | 0.10 $\pm$ 0.02 | 0.04 $\pm$ 0.00 | 0.05 $\pm$ 0.01      | 0.08 $\pm$ 0.01          | 0.11 $\pm$ 0.02 | 0.09 $\pm$ 0.01 |
| 1997 | 0.24 $\pm$ 0.04 | 0.51 $\pm$ 0.03 | 0.15 $\pm$ 0.04 | 0.04 $\pm$ 0.01 | 0.10 $\pm$ 0.02      | 0.04 $\pm$ 0.02 | 0.10 $\pm$ 0.01 | 0.06 $\pm$ 0.00 | 0.07 $\pm$ 0.01      | 0.07 $\pm$ 0.01          | 0.12 $\pm$ 0.02 | 0.07 $\pm$ 0.01 |
| 1998 | 0.19 $\pm$ 0.03 | 0.57 $\pm$ 0.05 | 0.17 $\pm$ 0.03 | 0.04 $\pm$ 0.01 | 0.12 $\pm$ 0.01      | 0.03 $\pm$ 0.00 | 0.11 $\pm$ 0.02 | 0.09 $\pm$ 0.01 | 0.08 $\pm$ 0.01      | 0.08 $\pm$ 0.01          | 0.11 $\pm$ 0.02 | 0.09 $\pm$ 0.01 |
| 1999 | 0.23 $\pm$ 0.04 | 0.73 $\pm$ 0.05 | 0.15 $\pm$ 0.02 | 0.06 $\pm$ 0.01 | 0.09 $\pm$ 0.01      | 0.05 $\pm$ 0.01 | 0.06 $\pm$ 0.01 | 0.10 $\pm$ 0.02 | 0.10 $\pm$ 0.01      | 0.10 $\pm$ 0.02          | 0.12 $\pm$ 0.02 | 0.10 $\pm$ 0.01 |
| 2000 | 0.21 $\pm$ 0.04 | 0.69 $\pm$ 0.08 | 0.10 $\pm$ 0.01 | 0.06 $\pm$ 0.01 | 0.09 $\pm$ 0.01      | 0.05 $\pm$ 0.01 | 0.06 $\pm$ 0.01 | 0.06 $\pm$ 0.01 | 0.09 $\pm$ 0.01      | 0.10 $\pm$ 0.01          | 0.12 $\pm$ 0.01 | 0.11 $\pm$ 0.02 |
| 2001 | 0.24 $\pm$ 0.04 | 0.63 $\pm$ 0.06 | 0.11 $\pm$ 0.02 | 0.04 $\pm$ 0.01 | 0.09 $\pm$ 0.01      | 0.03 $\pm$ 0.01 | 0.05 $\pm$ 0.01 | 0.04 $\pm$ 0.01 | 0.06 $\pm$ 0.01      | 0.07 $\pm$ 0.01          | 0.12 $\pm$ 0.02 | 0.11 $\pm$ 0.02 |
| 2002 | 0.26 $\pm$ 0.03 | 0.22 $\pm$ 0.04 | 0.08 $\pm$ 0.01 | 0.05 $\pm$ 0.02 | 0.10 $\pm$ 0.01      | 0.03 $\pm$ 0.01 | 0.04 $\pm$ 0.01 | 0.04 $\pm$ 0.00 | 0.04 $\pm$ 0.01      | 0.05 $\pm$ 0.01          | 0.13 $\pm$ 0.02 | 0.08 $\pm$ 0.01 |
| 2003 | 0.15 $\pm$ 0.02 | 0.17 $\pm$ 0.03 | 0.09 $\pm$ 0.02 | 0.04 $\pm$ 0.02 | 0.08 $\pm$ 0.01      | 0.04 $\pm$ 0.01 | 0.04 $\pm$ 0.01 | 0.04 $\pm$ 0.01 | 0.03 $\pm$ 0.02      | 0.05 $\pm$ 0.01          | 0.10 $\pm$ 0.01 | 0.07 $\pm$ 0.01 |
| 2004 | 0.19 $\pm$ 0.02 | 0.18 $\pm$ 0.02 | 0.11 $\pm$ 0.03 | 0.03 $\pm$ 0.01 | 0.05 $\pm$ 0.01      | 0.04 $\pm$ 0.01 | 0.07 $\pm$ 0.01 | 0.09 $\pm$ 0.01 | 0.02 $\pm$ 0.01      | 0.08 $\pm$ 0.01          | 0.08 $\pm$ 0.02 | 0.07 $\pm$ 0.01 |
| 2005 | 0.17 $\pm$ 0.04 | 0.24 $\pm$ 0.03 | 0.13 $\pm$ 0.03 | 0.05 $\pm$ 0.01 | 0.06 $\pm$ 0.01      | 0.04 $\pm$ 0.01 | 0.04 $\pm$ 0.00 | 0.06 $\pm$ 0.01 | 0.04 $\pm$ 0.01      | 0.07 $\pm$ 0.01          | 0.10 $\pm$ 0.02 | 0.08 $\pm$ 0.01 |
| 2006 | 0.20 $\pm$ 0.03 | 0.18 $\pm$ 0.03 | 0.08 $\pm$ 0.02 | 0.04 $\pm$ 0.01 | 0.05 $\pm$ 0.01      | 0.04 $\pm$ 0.01 | 0.03 $\pm$ 0.00 | 0.05 $\pm$ 0.01 | 0.04 $\pm$ 0.01      | 0.03 $\pm$ 0.00          | 0.12 $\pm$ 0.01 | 0.06 $\pm$ 0.01 |
| 2007 | 0.17 $\pm$ 0.03 | 0.17 $\pm$ 0.03 | 0.12 $\pm$ 0.02 | 0.04 $\pm$ 0.01 | 0.06 $\pm$ 0.01      | 0.03 $\pm$ 0.00 | 0.03 $\pm$ 0.01 | 0.04 $\pm$ 0.01 | 0.04 $\pm$ 0.00      | 0.04 $\pm$ 0.01          | 0.08 $\pm$ 0.01 | 0.09 $\pm$ 0.01 |
| 2008 | 0.19 $\pm$ 0.02 | 0.18 $\pm$ 0.01 | 0.17 $\pm$ 0.02 | 0.05 $\pm$ 0.01 | 0.08 $\pm$ 0.01      | 0.03 $\pm$ 0.00 | 0.04 $\pm$ 0.01 | 0.05 $\pm$ 0.01 | 0.06 $\pm$ 0.01      | 0.04 $\pm$ 0.00          | 0.09 $\pm$ 0.01 | 0.06 $\pm$ 0.01 |

Notes: Numbers of samples in every working category were 24 to 36 per year; \* Represents occupational category that produces lead fumes; the absence of an asterisk indicates the occupational category that produces lead dust.

**Table S2.** Pairwise correlations between cumulative lead dust exposure, work seniority and biomarkers.

| Variables       | Cumulative Dose | Work Seniority | Blood Lead | Urinary Lead | ZPP      | CP       | Lead Poisoning |
|-----------------|-----------------|----------------|------------|--------------|----------|----------|----------------|
| Cumulative dose | 1               | 0.324 **       | 0.627 **   | 0.518 **     | 0.427 ** | 0.111 ** | 0.603 **       |
| Work seniority  | 0.324 **        | 1              | 0.270 **   | 0.317 **     | 0.185 ** | 0.066    | 0.312 **       |
| Blood lead      | 0.627 **        | 0.270 **       | 1          | 0.588 **     | 0.455 ** | 0.224 ** | 0.712 **       |
| Urinary lead    | 0.518 **        | 0.317 **       | 0.588 **   | 1            | 0.231 ** | 0.229 ** | 0.550 **       |
| ZPP             | 0.427 **        | 0.185 **       | 0.455 **   | 0.231 **     | 1        | 0.297 ** | 0.347 **       |
| CP              | 0.111 **        | 0.066          | 0.224 **   | 0.229 **     | 0.297 ** | 1        | 0.532 **       |
| Lead poisoning  | 0.603 **        | 0.312 **       | 0.712 **   | 0.550 **     | 0.347 ** | 0.532 ** | 1              |

Note: \*\* represents  $p < 0.01$ .**Table S3.** Pairwise correlation between cumulative lead fume exposure, work seniority and biomarkers.

| Variables       | Cumulative Dose | Work Seniority | Blood Lead | Urinary Lead | ZPP      | CP       | Lead Poisoning |
|-----------------|-----------------|----------------|------------|--------------|----------|----------|----------------|
| Cumulative dose | 1               | 0.576 **       | 0.662 **   | 0.504 **     | 0.401 ** | 0.076 ** | 0.634 **       |
| Work seniority  | 0.576 **        | 1              | 0.223 **   | 0.294 **     | 0.192 ** | 0.108 ** | 0.325 **       |
| Blood lead      | 0.662 **        | 0.223 **       | 1          | 0.712 **     | 0.542 ** | 0.212 ** | 0.745 **       |
| Urinary lead    | 0.504 **        | 0.294 **       | 0.712 **   | 1            | 0.193 ** | 0.185 ** | 0.635 **       |
| ZPP             | 0.401 **        | 0.192 **       | 0.542 **   | 0.193 **     | 1        | 0.435 ** | 0.539 **       |
| CP              | 0.076           | 0.108          | 0.212 **   | 0.185 **     | 0.435 ** | 1        | 0.456 **       |
| Lead poisoning  | 0.634 **        | 0.325 **       | 0.745 **   | 0.635 **     | 0.539 ** | 0.456 ** | 1              |

Note: \*\* represents  $p < 0.01$ .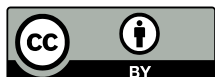

Supplement: ijerph-13-00328-s001.pdf [file ijerph-13-00328-s001.pdf]
